# Supplementary material for: Enhancing Li ion transfer efficacy in PEO-based solid polymer electrolytes to promote cycling stability of Li-metal batteries
Source: Royal Society of Chemistry journal article supplement (doi:10.1039/d2ta03283j), 2022-01-01
Supplement: d2ta03283j1.pdf [file d2ta03283j1.pdf]

## Supporting information

### **Enhancing Li ion transfer efficacy in PEO-based solid polymer electrolytes to promote cycling stability of Li-metal batteries**

**Cun Song<sup>a</sup>, Zhengang Li<sup>a</sup>, Jun Peng<sup>a</sup>, Xiaohong Wu<sup>a</sup>, Hao Peng<sup>b</sup>, Shiyuan Zhou<sup>a</sup>, Yu Qiao<sup>a</sup>,  
Hui Sun<sup>b</sup>, Ling Huang<sup>a\*</sup>, Shi-Gang Sun<sup>a\*</sup>**

<sup>a</sup> State Key Laboratory of Physical Chemistry of Solid Surfaces, Department of Chemistry, College of Chemistry and Chemical Engineering, Xiamen University, Xiamen, 361005, P. R. China

<sup>b</sup> State Key Laboratory of Heavy Oil Processing, Beijing Key Laboratory of Biogas Upgrading Utilization, College of New Energy and Materials, China University of Petroleum-Beijing, Beijing, 102249, P. R. China

The ionic conductivity ( $\kappa$ ) was calculated from the following equation:

$$\kappa = L/R_b S \quad (S1)$$

where  $L$  is the thickness of SPEs membrane,  $R_b$  is the bulk resistance of SPEs membrane that can be measured by EIS,  $S$  is the area of the stainless electrodes.

The  $\text{Li}^+$  current fraction was calculated by the Bruce-Vincent method (Li/Li symmetrical cells with SPEs) and the  $\rho^+$  is defined by the following equation:

$$\rho^+ = \frac{i_{ss}}{i_{\Omega}} \times \frac{\Delta V - i_{\Omega} R_{i,0} A}{\Delta V - i_{SS} R_{i,SS} A} \quad (S2)$$

where  $i_{ss}$  and  $i_{\Omega}$  refer to the steady-state and initial current densities,  $\Delta V$  is the dc potential across the electrolyte (10 mV in this work),  $R_{i,ss}$  and  $R_{i,0}$  refer to the interfacial resistance at steady-state and initial state, respectively,  $A$  is the area of electrode. The short-circuit test is conducted at a current density of 0.1 mA  $\text{cm}^{-2}$ , where with the battery configuration of Li/Li symmetrical cells with SPEs.

## The short-circuit time prediction.<sup>1</sup>

In Nernst-Einstein equation theory, the ambipolar diffusion coefficient ( $D$ ) can be calculated via law:

$$D = \sigma K T / C_0 q^2 \quad (S3)$$

where  $\sigma$  (i.e.,  $\kappa$ ) is DC ionic conductivity,  $T$  is the absolute temperature,  $K$  is the Boltzmann constant, and  $c_0$  is the Li concentration defined as the number of Li per unit volume, and  $q$  is the elementary charge.

The dendrite growth velocity  $v$  is equal to the anions drift velocity at the applied electric field. The  $v$  can be calculated by the following equation:

$$v = \mu_a E_0 \quad (S4)$$

$$E_0 = J / \sigma \quad (S5)$$

Where  $\mu_a$  is the anion mobility,  $E_0$  is the applied electric field,  $J$  is the applied current density. The time required for dendrites to grow, propagate and traverse the distance  $L$  between anode and cathode can be described by the following equation:

$$t_g = \sigma L / \mu_a J \quad (S6)$$

The  $\mu_a$  can be obtained from the Einstein relation as:

$$\mu_a = qDt_a/kT \quad (S7)$$

The dendrite growth onset time (Sand's time) can be described as follows:

$$\tau_s = \pi D(eC_0/2Jt_a)^2 \quad (S8)$$

where  $\tau_s$  is sand's time,  $e$  is the elementary charge,  $t_a$  is the anionic transference number that equals to  $1-t_{Li^+}$ , and the  $t_{Li^+}$  is of the similar calculation equation to  $Li^+$  current fraction.

Based on the discussion above, the predicted short-circuit time  $t_{sc}$  can be obtained via a law:

$$t_{sc} = \pi D(eC_0/2Jt_a)^2 + \sigma L/\mu_a L \quad (S9)$$

The higher  $t_{sc}$  is, the longer lifetime of batteries are.

Table S1. The specific component proportions of PEO-, PEO/LLZTO-, PEO/LLZTO/FEC-, PLFS-SPEs.

| Sample    | PEO wt% | LiTFSI wt% | LLZTO wt% | FEC wt% | SN wt% |
|-----------|---------|------------|-----------|---------|--------|
| PEO-SPEs  | 73.93%  | 26.61%     | --        | --      | --     |
| PL-SPEs   | 60.60%  | 21.97%     | 17.43%    | --      | --     |
| PLF-SPEs  | 56.38%  | 20.37%     | 16.21%    | 7.04%   | --     |
| PLFS-SPEs | 45.74%  | 16.52%     | 13.15%    | 5.72%   | 18.87% |

Table S2. The calculation results of specific parameters.

| <b>Sample</b> | $i_{\Omega}/\mu\text{A}$ | $i_{ss}/\mu\text{A}$ | $R_{i,0}/\Omega$ | $R_{i,ss}/\Omega$ | $\rho^+$     | $\kappa(25^{\circ}\text{C})$<br>$/10^{-4} \text{ S cm}^{-1}$ | $\kappa\rho^+$<br>$/10^{-6} \text{ S cm}^{-1}$ | $\kappa\rho^+/\kappa\rho^+(\text{PEO})$ |
|---------------|--------------------------|----------------------|------------------|-------------------|--------------|--------------------------------------------------------------|------------------------------------------------|-----------------------------------------|
| <b>PEO</b>    | 9.67                     | 2.55                 | 603              | 697               | <b>0.134</b> | <b>0.11</b>                                                  | 1.49                                           | <b>1</b>                                |
| <b>PL</b>     | 7.77                     | 1.86                 | 430              | 432               | <b>0.173</b> | <b>0.09</b>                                                  | 1.58                                           | <b>1.06</b>                             |
| <b>PLF</b>    | 5.02                     | 1.51                 | 725              | 587               | <b>0.201</b> | <b>0.99</b>                                                  | 20.67                                          | <b>13.85</b>                            |
| <b>PLFS</b>   | 16.45                    | 8.96                 | 279              | 271               | <b>0.389</b> | <b>1.58</b>                                                  | 61.63                                          | <b>41.29</b>                            |

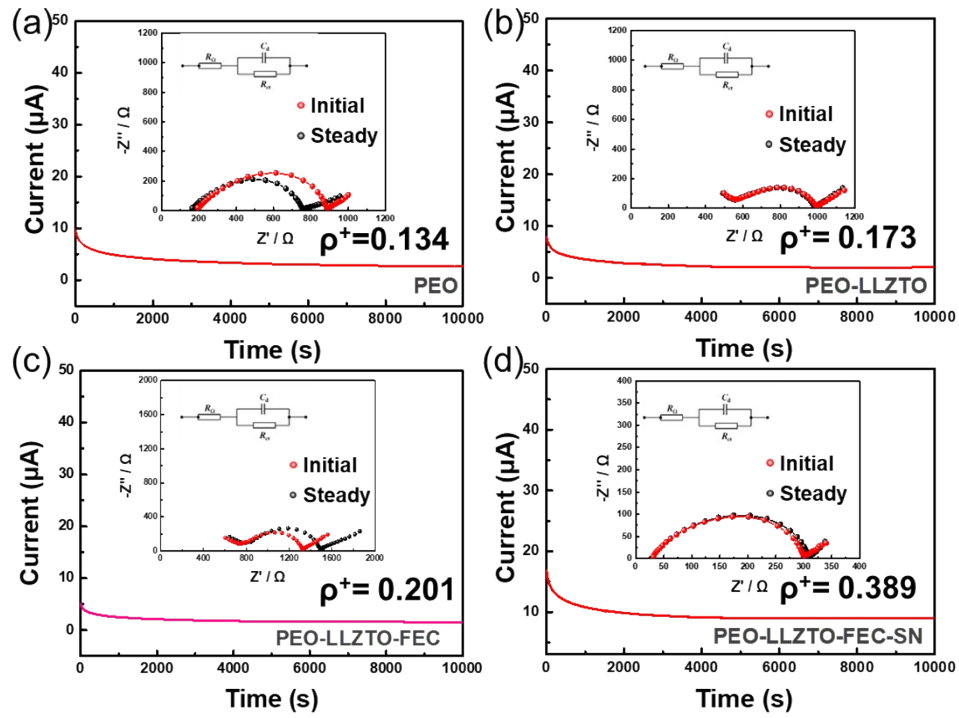

Figure S1.  $\text{Li}^+$  current fraction ( $\rho^+$ ), calculated by formula (2), of various SPEs: a, b, c, d) PEO-, PEO-LLZTO-, PEO-LLZTO-FEC-, PLFS-SPEs at 25°C.

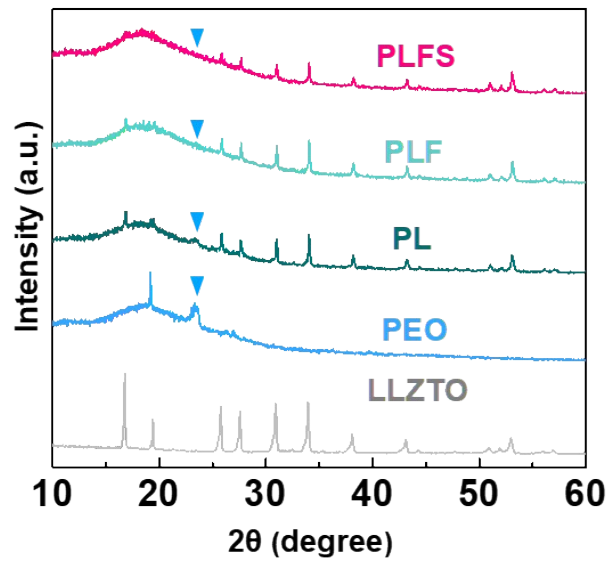

Figure S2. XRD patterns of various SPEs.

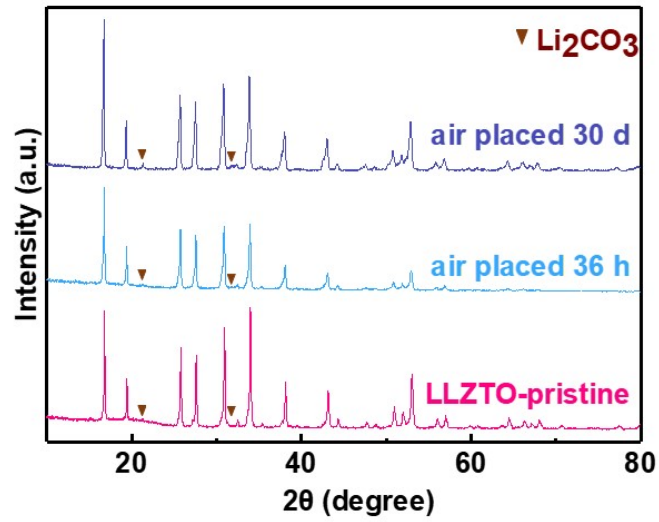

Figure S3. XRD patterns of LLZTO-pristine and air-placed for different time.

After placing LLZTO in air-exposed condition, new diffraction peak at 21.34° and 31.78° corresponding to Li<sub>2</sub>CO<sub>3</sub> appeared, indicating that the Li<sub>2</sub>CO<sub>3</sub> is easily formed during LLZTO synthesis and transfer process.<sup>2</sup>



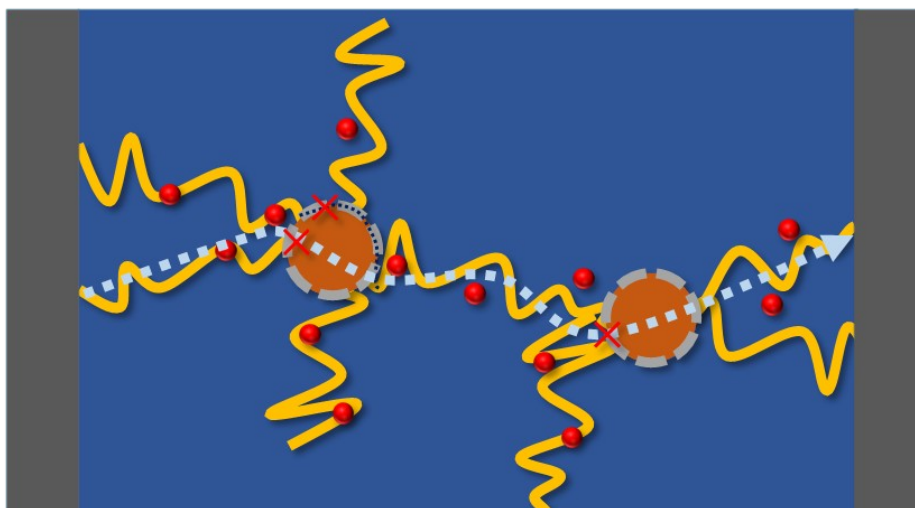

Figure S4. A possible scheme of  $\text{Li}^+$  transfer in PEO/LLZTO electrolyte.

The incorporated LLZTO in PEO segment chains is beneficial to promote the  $\text{Li}^+$  conduction at the LLZTO/PEO interface, while the  $\text{Li}_2\text{CO}_3$  formed at LLZTO surface hindered this process, resulting in the decrease of ionic conductivity of PL-SPEs even though the crystallinity of PEO was decreased.

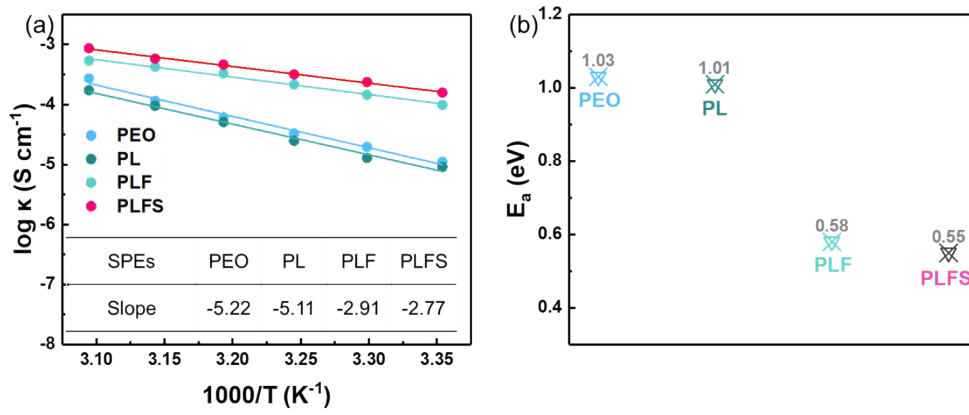

Figure S5. a) The fitting curves of Arrhenius equation of varies SPEs, b) the Li<sup>+</sup> transfer activation energy of varies SPEs.

The Li<sup>+</sup> transfer activation energy can be calculated by fitting Arrhenius equation:

$$\log \kappa = \log A + \frac{-E_a}{2303R} \left( \frac{1000}{T} \right) \quad (\text{S10})$$

Where  $A$  is a constant that is proportional to the charge carrier number,  $E_a$  is the Li<sup>+</sup> transfer activation energy,  $R$  is the perfect gas constant.

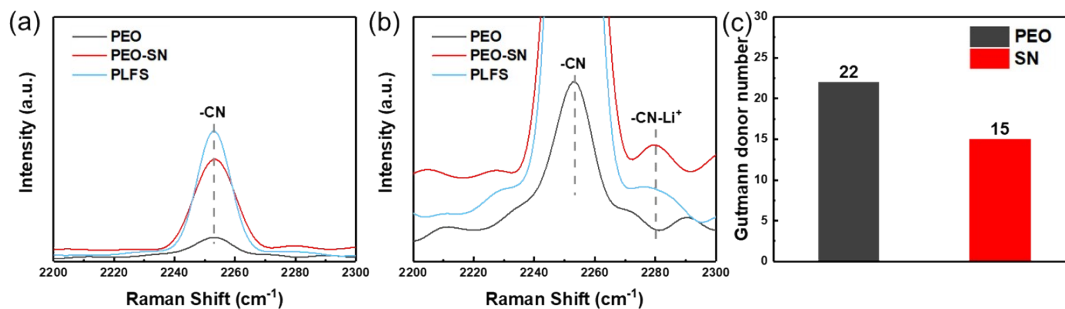

Figure S6. a, b) Raman spectra of PEO, PEO-SN and PLFS. c) Gutmann donor number of PEO and SN.

As shown in Figure S6a and S6b, a strong Raman band at  $2253\text{ cm}^{-1}$  corresponds to the  $\text{-C}\equiv\text{N}$  stretching of SN. A weak signal of  $2253\text{ cm}^{-1}$  of PEO curve originates from the residual AN solvent molecule. With the addition of SN, a Raman band at  $2280\text{ cm}^{-1}$  corresponding to  $\text{Li}^+\text{-SN}$  appears, indicating that the SN participated in  $\text{Li}^+$  coordination.

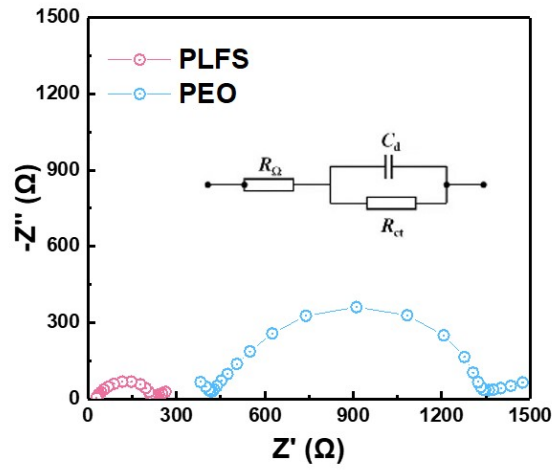

Figure S7. The impedance spectra of Li/Li symmetrical batteries with PEO- and PLFS-SPEs.

Table S3. The values of  $\Delta H_m$  from DSC test and  $X_c$  of PEO- and PLFS-SPEs.

| Electrolyte | $\Delta H_m$ (Jg <sup>-1</sup> ) | X%   |
|-------------|----------------------------------|------|
| PEO         | 123.4                            | 60.8 |
| PLFS        | 36.31                            | 17.9 |

The crystallinities ( $X_c$ ) of SPEs can be calculated by the following equation:

$$x_c = \Delta H_m / \Delta H_{PEO} \quad (S11)$$

Where  $X_c$  represents the relative percentage of crystallinity of PEO-SPEs, and the  $\Delta H_{PEO}$  represents the  $\Delta H$  of 100 % crystalline PEO (203 J g<sup>-1</sup>).

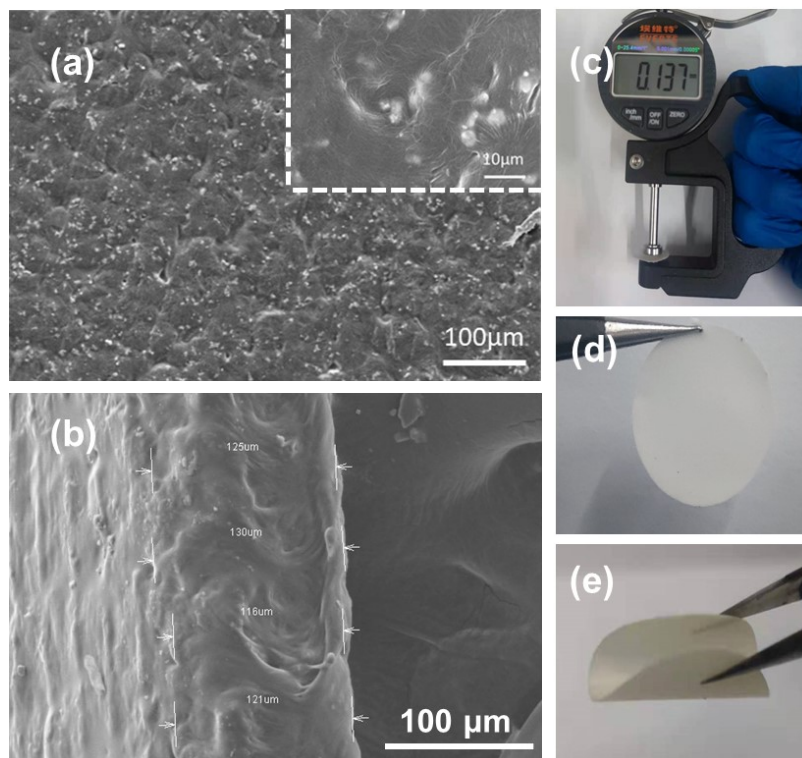

Figure S8. Morphology characterization of PLFS-SPEs. a, b) SEM images of front and side view of PLFS-SPEs' morphology. c) Thickness measurement of PLFS-SPEs. d, e) The digital picture and flexible properties of PLFS-SPEs.

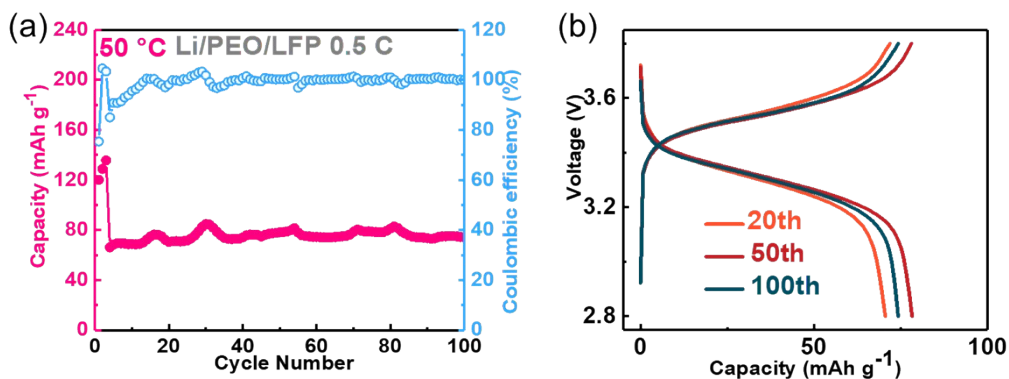

Figure S9. a, b) Cycling performance and voltage-capacity profiles of Li/PEO/LFP battery operated at 50 °C and 0.5 C.

As shown in Figure S9, when cycled at 0.1 C during the active process, the Li/PEO/LFP battery demonstrates a capacity increase to around 150 mAh g<sup>-1</sup>, revealing the good contact of PEO-SPEs to electrode that have no obvious impact to capacity at low rate. When give a high rate of 0.5 C, a huge capacity discrepancy appeared, which should be attributed to the mass transfer polarization.

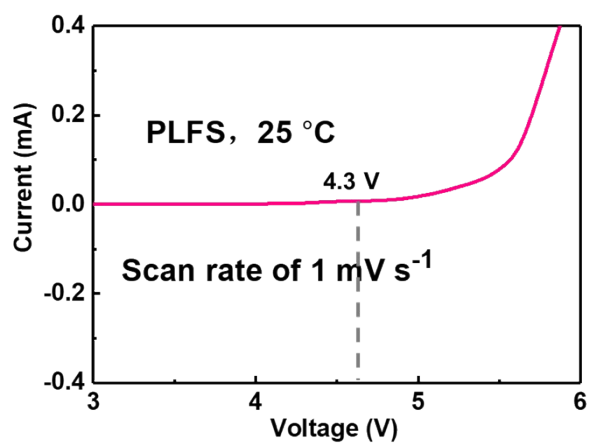

Figure S10. Linear sweep voltammetry curves of PLFS-SPEs under 25 °C at a scan rate of 1 mV s<sup>-1</sup>.



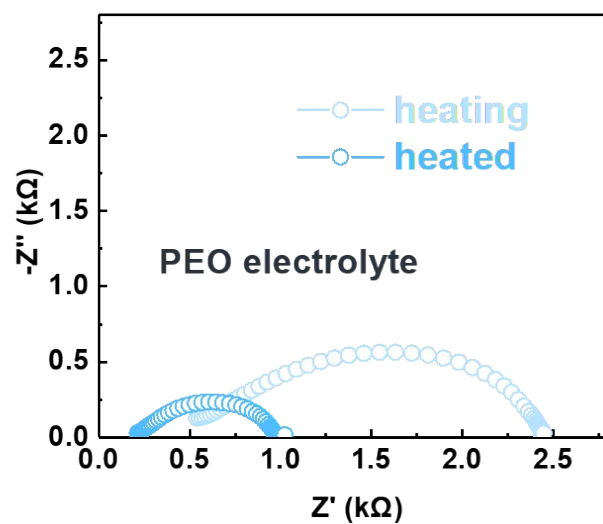

Figure S11. Comparison of interfacial resistance in Li/Li symmetry cell with PEO-SPEs before and after heat treatment.

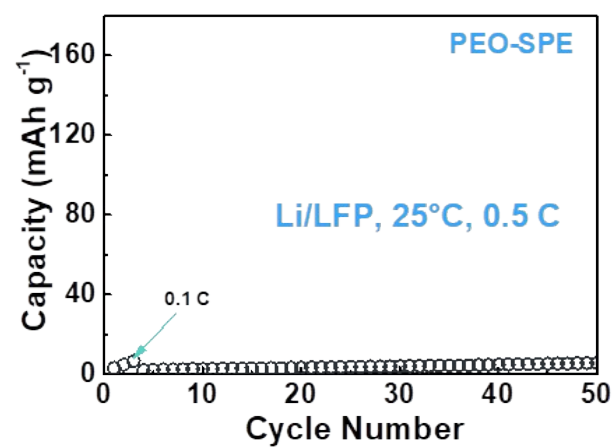

Figure S12. Electrochemical performance of Li/LFP battery assembled with PEO-SPEs at 25 °C.

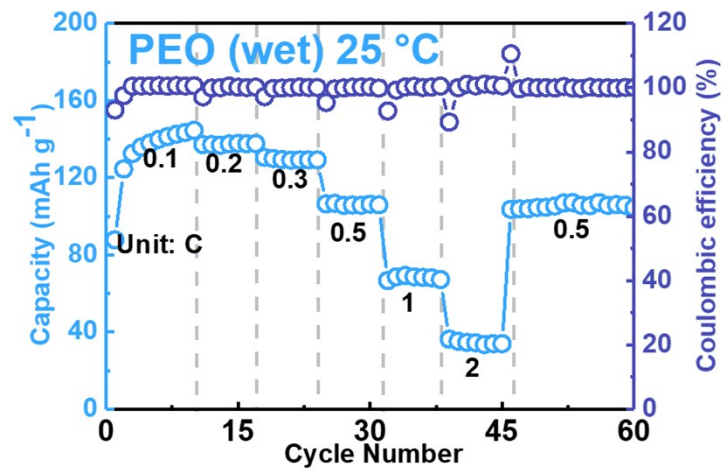

Figure S13. Rate performance of Li/LFP battery assembled with PEO-SPEs at various current density (25 °C).

Table S4. Comparison of electrochemical performance of Li-metal batteries of this work with those reported in literatures. The Li-metal batteries were assembled with various SPEs operated at 25 °C and 50 °C.

| Temperature (°C) | Cycle number | SPEs configuration               | $\kappa$ ( $10^{-4}$ S cm $^{-1}$ ) | $\rho^+$   | Ref.          |
|------------------|--------------|----------------------------------|-------------------------------------|------------|---------------|
| 25               | 700          | PEO/LLZTO/FEC/SN                 | 1.58                                | 0.39       | this work     |
| 25               | 30           | PEO/3D LLTO                      | 1.80                                | 0.33       | <sup>3</sup>  |
| 25               | 100          | PEO-TEGDME-EMIMTFSI-LiTFSI-BP    | 24.0                                | 0.32       | <sup>4</sup>  |
| 25               | 120          | PEO-ANP-5                        | 3.00                                | 0.95       | <sup>5</sup>  |
| 50               | 400          | PEO/LLZTO/FEC/SN                 | 8.68                                | 0.39       | this work     |
| 60               | 70           | PEO/LLTO/LiTFSI                  | 2.39                                | ---        | <sup>6</sup>  |
| 55               | 100          | PEO/LiTFSI+10%LLZTO              | 1.17                                | ---        | <sup>7</sup>  |
| 60               | 50           | PEO-h-BN-LiTFSI                  | 1.45                                | 0.33       | <sup>8</sup>  |
| 60               | 100          | PEO-LLZTO-LiTFSI                 | 0.112                               | 0.58       | <sup>9</sup>  |
| 55               | 100          | 70LLZO-30PEC-5(PVdF-HFP)-60LiFSI | 0.52(50°C)                          | 0.82(50°C) | <sup>10</sup> |

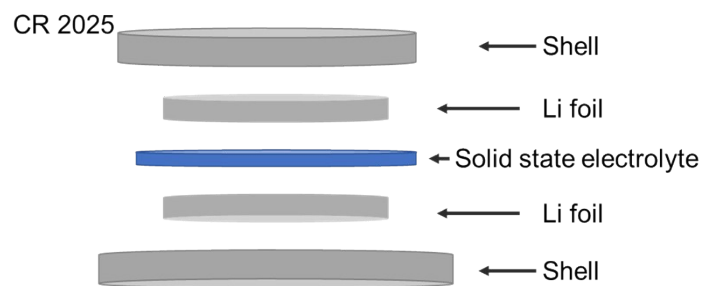

Figure S14. Diagram of Li/Li symmetric cell with CR 2025-type cell.

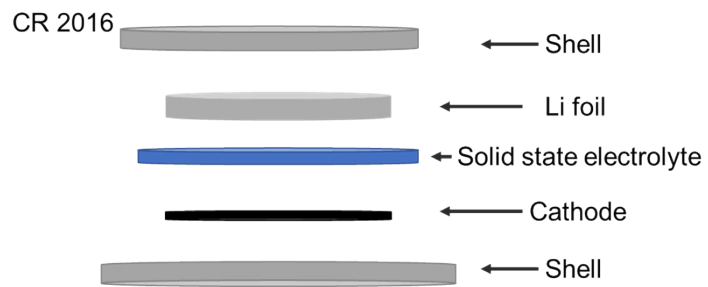

Figure S15. Diagram of Li/LFP battery with CR 2016-type cell.

## References:

- [1] X. Li, Y. Zheng, Q. Pan, C.Y. Li, Polymerized Ionic Liquid-Containing Interpenetrating Network Solid Polymer Electrolytes for All-Solid-State Lithium Metal Batteries. *ACS Appl. Mater. Interfaces* 2019, 11 (38), 34904-34912.
- [2] W. Xia, B. Xu, H. Duan, X. Tang, Y. Guo, H. Kang, H. Li, H. Liu, Reaction mechanisms of lithium garnet pellets in ambient air: The effect of humidity and CO<sub>2</sub>. *Journal of the American Ceramic Society* 2017, 100 (7), 2832-2839.
- [3] X. Wang, Y. Zhang, X. Zhang, T. Liu, Y.H. Lin, L. Li, Y. Shen, C.W. Nan, Lithium-Salt-Rich PEO/Li<sub>0.3</sub>La<sub>0.557</sub>TiO<sub>3</sub> Interpenetrating Composite Electrolyte with Three-Dimensional Ceramic Nano-Backbone for All-Solid-State Lithium-Ion Batteries. *ACS Appl. Mater. Interfaces* 2018, 10 (29), 24791-24798.
- [4] R. Rojaee, S. Cavallo, S. Mogurampelly, B.K. Wheatle, V. Yurkiv, R. Deivanayagam, T. Foroozan, M.G. Rasul, S. Sharifi-Asl, A.H. Phakatkar, M. Cheng, S.B. Son, Y. Pan, F. Mashayek, V. Ganesan, R. Shahbazian-Yassar, Highly-Cyclable Room-Temperature Phosphorene Polymer Electrolyte Composites for Li Metal Batteries. *Adv. Funct. Mater.* 2020, 30 (32), 1910749.
- [5] D.M. Shin, J.E. Bachman, M.K. Taylor, J. Kamcev, J.G. Park, M.E. Ziebel, E. Velasquez, N.N. Jarenwattananon, G.K. Sethi, Y. Cui, J.R. Long, A Single-Ion Conducting Borate Network Polymer as a Viable Quasi-Solid Electrolyte for Lithium Metal Batteries. *Adv. Mater.* 2020, 32 (10), 1905771.
- [6] Z. Wan, D. Lei, W. Yang, C. Liu, K. Shi, X. Hao, L. Shen, W. Lv, B. Li, Q.-H. Yang, F. Kang, Y.-B. He, Low Resistance-Integrated All-Solid-State Battery Achieved by Li<sub>7</sub>La<sub>3</sub>Zr<sub>2</sub>O<sub>12</sub> Nanowire Upgrading Polyethylene Oxide (PEO) Composite Electrolyte and PEO Cathode Binder. *Adv. Funct. Mater.* 2019, 29 (1), 1805301.
- [7] L. Chen, Y. Li, S.-P. Li, L.-Z. Fan, C.-W. Nan, J.B. Goodenough, PEO/garnet composite electrolytes for solid-state lithium batteries: From “ceramic-in-polymer” to “polymer-in-ceramic”. *Nano Energy* 2018, 46, 176-184.
- [8] Y. Li, L. Zhang, Z. Sun, G. Gao, S. Lu, M. Zhu, Y. Zhang, Z. Jia, C. Xiao, H. Bu, K. Xi, S. Ding, Hexagonal boron nitride induces anion trapping in a polyethylene oxide based solid polymer electrolyte for lithium dendrite inhibition. *J. Mater. Chem. A* 2020, 8 (19), 9579-9589.
- [9] C.Z. Zhao, X.Q. Zhang, X.B. Cheng, R. Zhang, R. Xu, P.Y. Chen, H.J. Peng, J.Q. Huang, Q. Zhang, An anion-immobilized composite electrolyte for dendrite-free lithium metal anodes. *Proc. Natl. Acad. Sci. U.S.A.* 2017, 114 (42), 11069-11074.
- [10] Z. He, L. Chen, B. Zhang, Y. Liu, L.-Z. Fan, Flexible poly(ethylene carbonate)/garnet composite solid electrolyte reinforced by poly(vinylidene fluoride-hexafluoropropylene) for lithium metal batteries. *J. Power Sources* 2018, 392, 232-238.
